# Supplementary material for: Effectiveness of Antipsychotic Use for Reducing Risk of Work Disability: Results From a Within-Subject Analysis of a Swedish National Cohort of 21,551 Patients With First-Episode Nonaffective Psychosis
Source: Atypon-hosted journal article supplement (doi:10.1176/appi.ajp.21121189), 2022-10-06
Supplement: appi.ajp.21121189.ds001.pdf [file appi.ajp.21121189.ds001.pdf]

## CONTENTS

### Methods

**Table S1.** Events, person-years (with event) by antipsychotic treatment

**Table S2.** Users, events and person-years (PYs) of monotherapies of specific long-acting injectables (LAIs) and their corresponding oral formulations (OAP), and risk of sickness absence or disability pension

**Table S3.** Risk of sickness absence or disability pension during antipsychotic (AP) use versus non-use in patients with first-episode non-affective psychosis, within-individual analyses, within two years, between two to five years, and more than five years since non-affective psychosis onset

**Figure S1.** Study design

**Figure S2.** Development of main occupational activity of persons with first-episode non-affective psychosis, from 2 calendar years before and until 5 years after the first diagnoses, stratified by A) antipsychotic use (N=14,392) vs. B) non-use (N=7,159) during the follow-up. Timepoint 0 refers to the year of first psychosis diagnosis.

**Figure S3.** Development of main occupational activity of persons with first-episode non-affective psychosis, from 2 calendar years before and until 5 years after the first diagnoses among those diagnosed during 2006-2011 who had five years of follow-up time in terms of data linkage (up until end of 2016), stratified by A) antipsychotic use (N=7,849) vs. B) non-use (N=3,186) during the follow-up. Timepoint 0 refers to the year of first psychosis diagnosis.

**Figure S4.** Risk of sickness absence or disability pension antipsychotic use versus non-use in patients with first-episode non-affective psychosis, within-individual sensitivity analysis in those without antipsychotic before diagnosis

**Figure S5.** Risk of sickness absence or disability pension antipsychotic use versus non-use in patients with first-episode non-affective psychosis, within-individual sensitivity analysis in those without sickness absence at baseline

**Figure S6.** Risk of sickness absence or disability pension antipsychotic use versus non-use in patients with first-episode non-affective psychosis, within-individual sensitivity analysis when first 30 days was censored from all exposures

**Figure S7.** Risk of sickness absence during antipsychotic use versus non-use in patients with first-episode non-affective psychosis, within-individual sensitivity analysis (censoring to disability pension)

**Figure S8.** Risk of sickness absence during antipsychotic use versus non-use in patients with first-episode non-affective psychosis, within-individual sensitivity analysis among those who were not granted with disability pension ever during the follow-up

**Figure S9.** Risk of sickness absence or disability pension during antipsychotic (AP) use versus non-use in patients with first-episode non-affective psychosis, within-individual analyses among those who were employed during previous year before cohort entry

**Figure S10.** Risk of sickness absence or disability pension during antipsychotic (AP) use versus non-use in patients with first-episode non-affective psychosis, within-individual analyses stratified by gender

**Figure S11.** Risk of sickness absence or disability pension during antipsychotic (AP) use versus non-use in patients with first-episode non-affective psychosis, within-individual analyses stratified by baseline educational level

## **Methods**

### *PRE2DUP method*

Among several methods developed and used to measure drug use periods, PRE2DUP is a validated and accurate method that goes beyond simplistic and fixed assumptions<sup>16,40,41</sup>. PRE2DUP accounts for each individual's purchase history, building exposure time periods and estimating the drug dose based on the purchased Defined Daily Doses. PRE2DUP accounts for stockpiling of drugs, pattern of purchasing (i.e., regularity), as well as inpatient hospital periods when drug use is not recorded in the Prescribed Drug Register. Modelling of drug use periods is controlled via expert-defined parameters designed for each drug package (identified through Nordic Article number, vnr) and thus, for each package size, drug formulation and strength. The method also enables separate modelling of oral versus long-acting injectable antipsychotics which have different use patterns. The method is particularly valid for long-term medications, such as antipsychotics.

**TABLE S1.** Events, person-years (PY) (with event) by antipsychotic treatment.

|                       | <b>Events</b> | <b>PY</b> | <b>PY with event</b> |
|-----------------------|---------------|-----------|----------------------|
| <b>No treatment</b>   | 9,930         | 47,545    | 20,489               |
| <b>Olanzapine</b>     | 1,519         | 6,216     | 3,276                |
| <b>AP Polytherapy</b> | 1,237         | 3,407     | 1,808                |
| <b>Aripiprazole</b>   | 792           | 2,859     | 1,693                |
| <b>Quetiapine</b>     | 787           | 2,660     | 1,552                |
| <b>Risperidone</b>    | 748           | 2,769     | 1,610                |
| <b>Other oral AP</b>  | 718           | 2,292     | 1,354                |
| <b>Any LAI</b>        | 344           | 1,335     | 669                  |

AP, antipsychotic; LAI, long-acting injectable antipsychotic

**TABLE S2.** Users, events and person-years (PYs) of monotherapies of specific long-acting injectables (LAIs) and their corresponding oral formulations (OAP). Adjusted Hazard Ratios (aHRs) for sickness absence or disability pension presented in comparison with non-use of all antipsychotics. Of LAI users, n=5 users of fluphenazine LAI were omitted as HR could not be calculated due to lack of events and no one used fluphenazine OAP in monotherapy. Adjusted for use of other antipsychotics, antidepressants, mood stabilizers, benzodiazepines and related drugs, temporal order of treatments and time since cohort entry.

| Drug                             | OAP   |        |       | LAI   |        |      | OAP                    | LAI              |
|----------------------------------|-------|--------|-------|-------|--------|------|------------------------|------------------|
|                                  | Users | Events | PYs   | Users | Events | PYs  | aHR (95%CI)            | aHR (95%CI)      |
| Risperidone                      | 3323  | 748    | 2769  | 349   | 93     | 316  | 0.72 (0.58-0.88)       | 0.40 (0.24-0.67) |
| Paliperidone                     | 326   | 93     | 265   | 280   | 64     | 214  | 0.65 (0.40-1.04)       | 0.27 (0.12-0.63) |
| Perphenazine                     | 418   | 106    | 376   | 234   | 55     | 200  | 0.90 (0.61-1.35)       | 0.60 (0.31-1.15) |
| Zuclophenixol                    | 349   | 76     | 205   | 257   | 51     | 193  | 0.73 (0.44-1.22)       | 0.58 (0.26-1.32) |
| Haloperidol                      | 849   | 166    | 521   | 148   | 27     | 136  | 0.81 (0.55-1.18)       | 0.29 (0.09-0.96) |
| Olanzapine                       | 7531  | 1519   | 6216  | 187   | 23     | 126  | 0.68 (0.59-0.78)       | 1.11 (0.33-3.81) |
| Aripiprazole                     | 3349  | 792    | 2859  | 172   | 21     | 100  | 0.68 (0.56-0.82)       | 0.62 (0.25-1.54) |
| Flupentixol                      | 363   | 122    | 378   | 48    | 9      | 32   | 0.64 (0.39-1.04)       | 0.29 (0.06-1.57) |
| Any LAI vs.<br>corresponding OAP | 12212 | 3622   | 13589 | 1436  | 343    | 1317 | reference <sup>1</sup> | 0.66 (0.49-0.90) |

<sup>1</sup>In this comparison, any LAI is compared with corresponding OAPs as a reference.

**TABLE S3.** Risk of sickness absence or disability pension during antipsychotic (AP) use versus non-use in patients with first-episode non-affective psychosis, within-individual analyses, within two years, between two to five years, and more than five years since non-affective psychosis onset.

|                       | <2 years         | 2-5 years        | >5 years         |
|-----------------------|------------------|------------------|------------------|
| <b>Any AP vs no</b>   | 0.64 (0.50-0.82) | 0.63 (0.50-0.79) | 0.59 (0.46-0.75) |
| <b>Any LAI</b>        | 0.20 (0.08-0.49) | 0.43 (0.21-0.91) | 0.34 (0.18-0.63) |
| <b>AP polytherapy</b> | 0.51 (0.31-0.82) | 0.59 (0.36-0.96) | 0.51 (0.29-0.90) |
| <b>Risperidone</b>    | 0.60 (0.35-1.00) | 0.99 (0.59-1.67) | 0.62 (0.30-1.25) |
| <b>Other oral AP</b>  | 0.64 (0.40-1.01) | 0.60 (0.38-0.94) | 0.65 (0.40-1.06) |
| <b>Olanzapine</b>     | 0.70 (0.50-0.97) | 0.57 (0.39-0.83) | 0.52 (0.34-0.80) |
| <b>Quetiapine</b>     | 0.74 (0.43-1.27) | 0.63 (0.40-0.99) | 0.82 (0.51-1.32) |
| <b>Aripiprazole</b>   | 0.78 (0.47-1.31) | 0.63 (0.41-0.96) | 0.58 (0.37-0.91) |

AP, antipsychotic; LAI, long-acting injectable antipsychotic

**FIGURE S1.** Study design

Illustration of within-individual design where each individual act as his/her own control

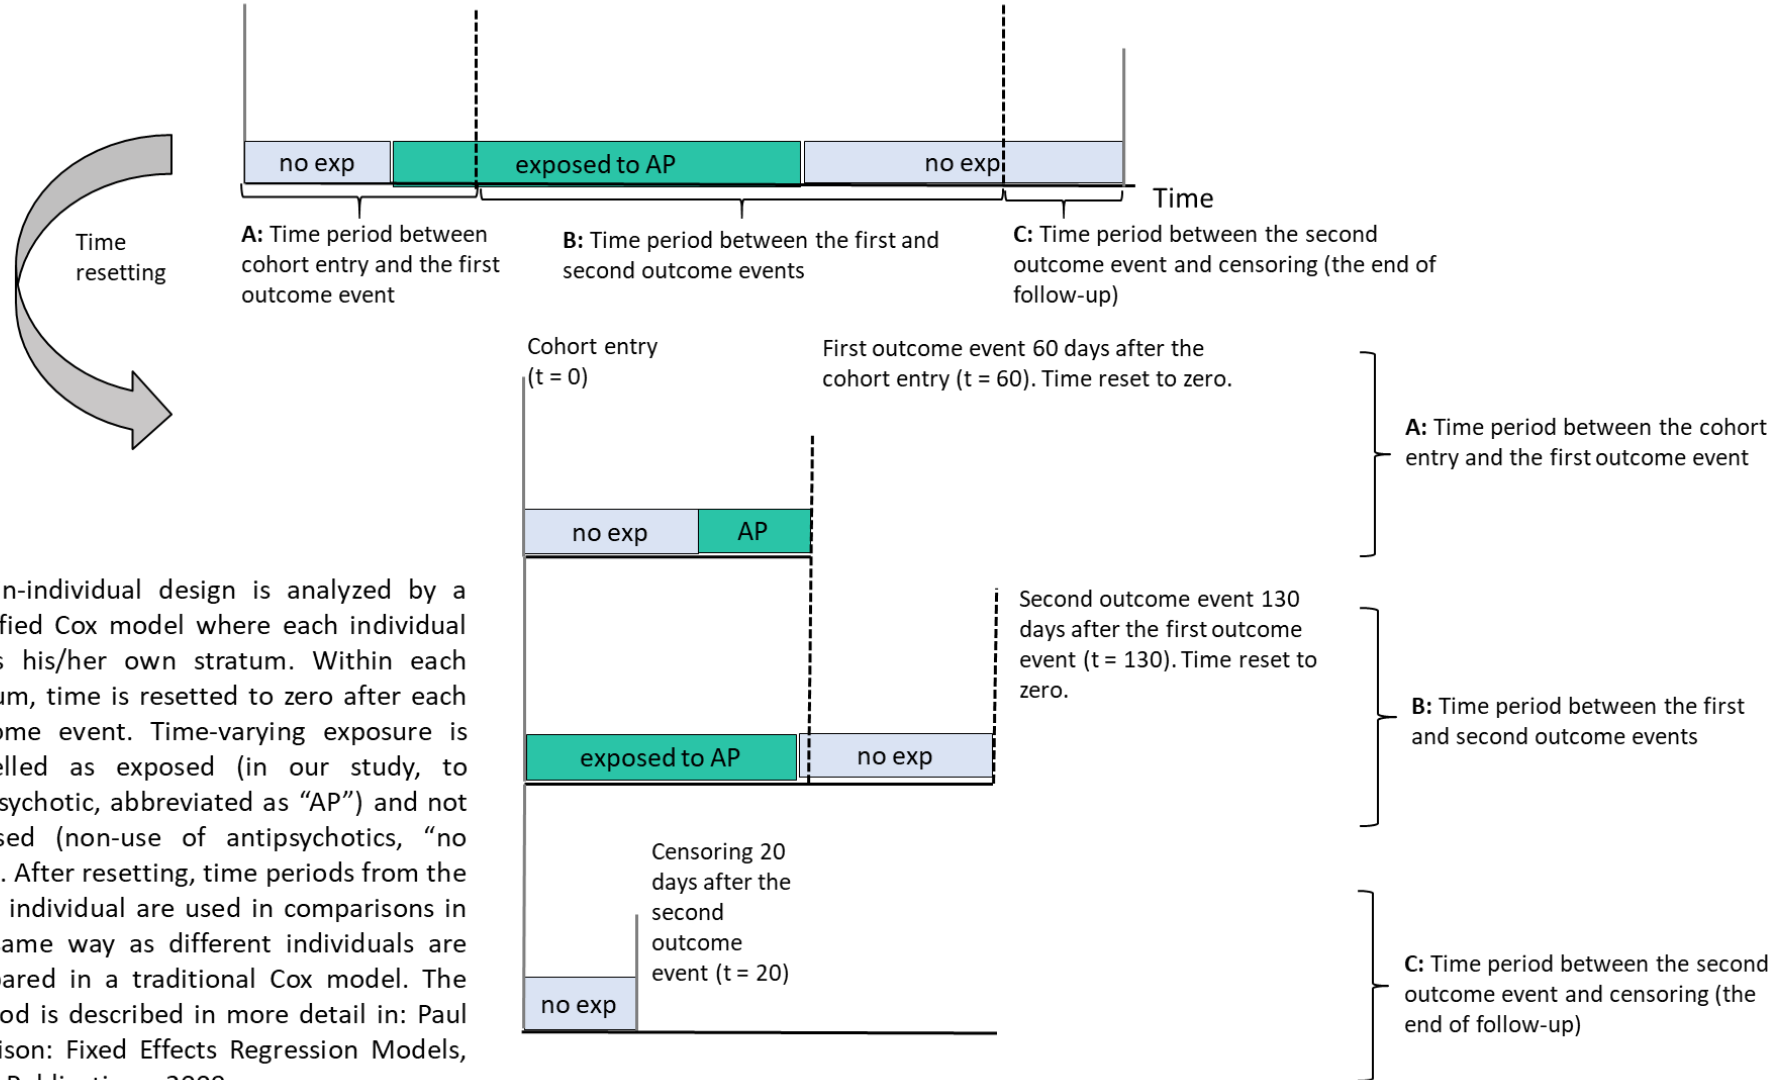

Within-individual design is analyzed by a stratified Cox model where each individual forms his/her own stratum. Within each stratum, time is reset to zero after each outcome event. Time-varying exposure is modelled as exposed (in our study, to antipsychotic, abbreviated as “AP”) and not exposed (non-use of antipsychotics, “no exp”). After resetting, time periods from the same individual are used in comparisons in the same way as different individuals are compared in a traditional Cox model. The method is described in more detail in: Paul D Allison: Fixed Effects Regression Models, SAGE Publications, 2009.

**FIGURE S2.** Development of main occupational activity of persons with first-episode non-affective psychosis, from 2 calendar years before and until 5 years after the first diagnoses, stratified by A) antipsychotic use (N=14,392) vs. B) non-use (N=7,159) during the follow-up. Timepoint 0 refers to the year of first psychosis diagnosis.

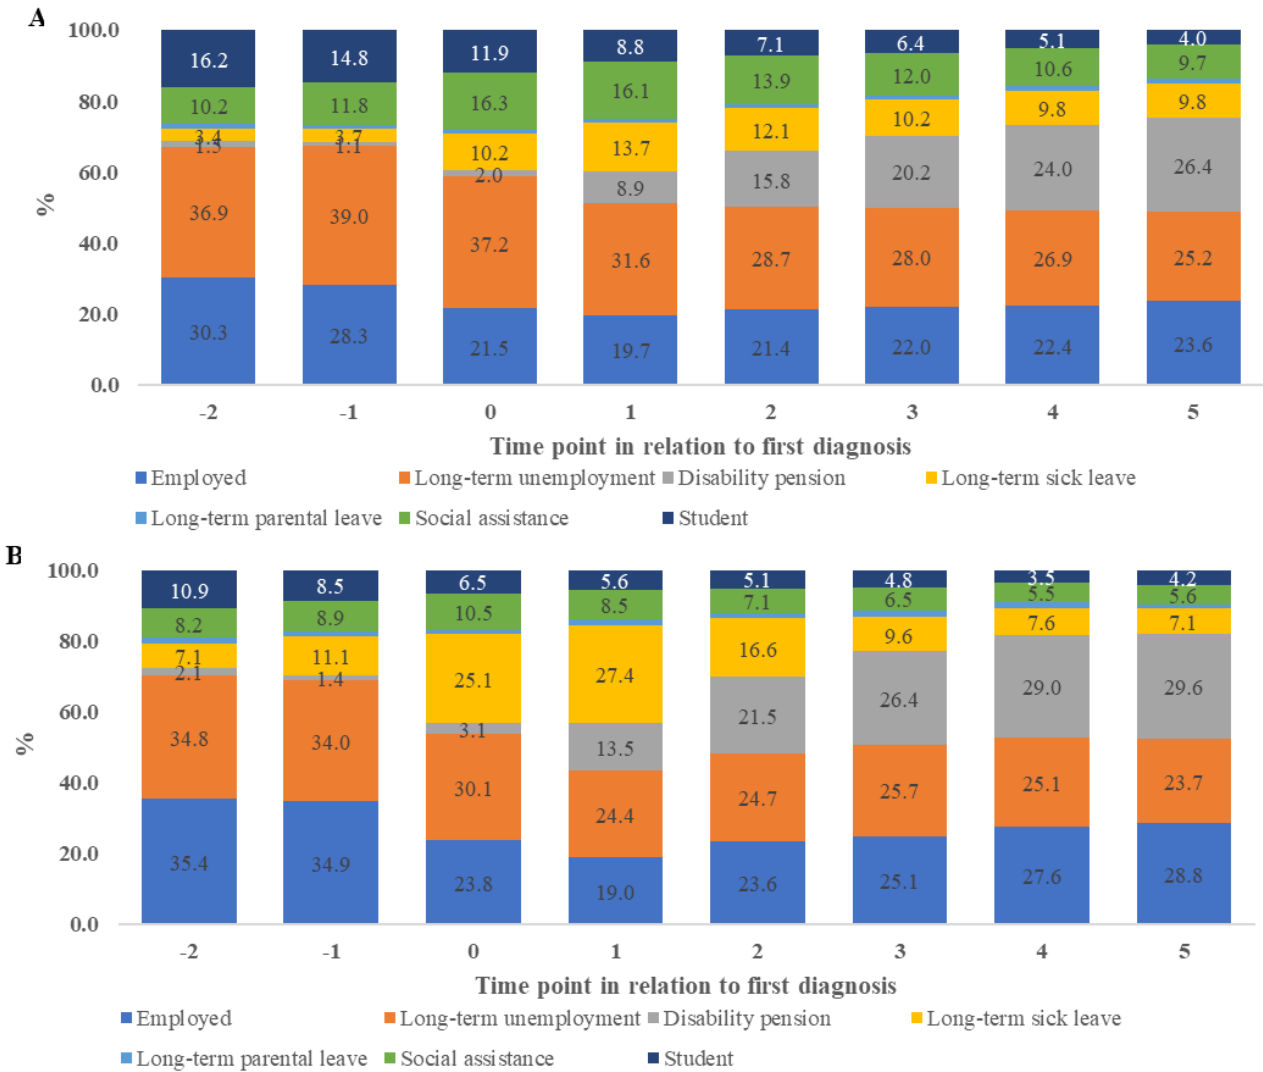



**FIGURE S3.** Development of main occupational activity of persons with first-episode non-affective psychosis, from 2 calendar years before and until 5 years after the first diagnoses among those diagnosed during 2006-2011 who had five years of follow-up time in terms of data linkage (up until end of 2016), stratified by A) antipsychotic use (N=7,849) vs. B) non-use (N=3,186) during the follow-up. Timepoint 0 refers to the year of first psychosis diagnosis.

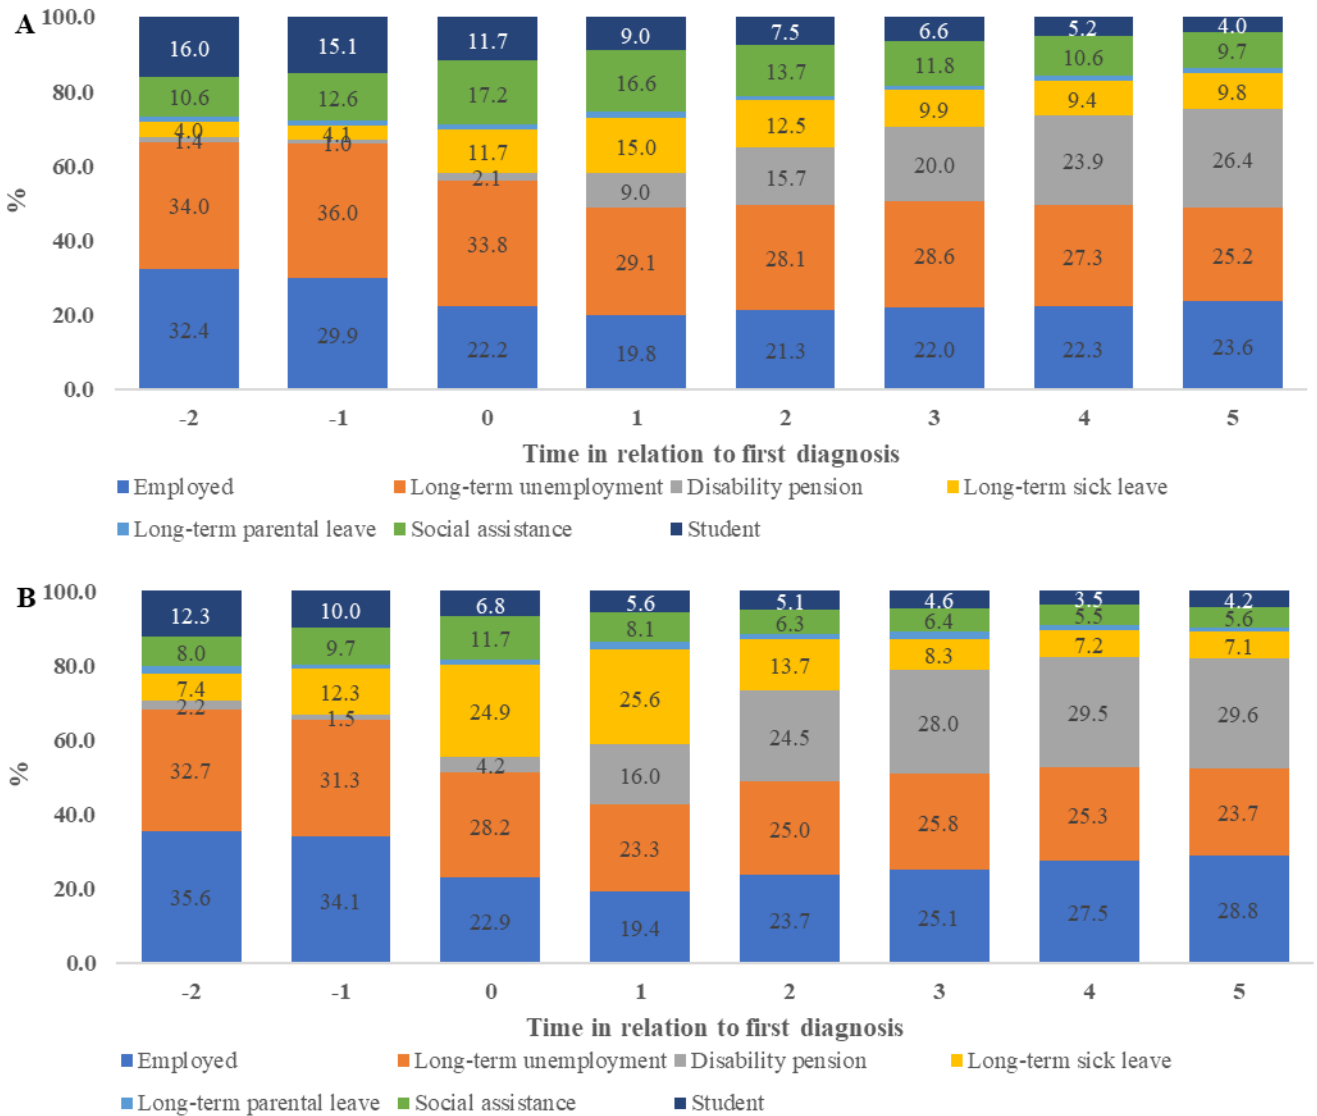

**FIGURE S4.** Risk of sickness absence or disability pension antipsychotic during use versus non-use in patients with first-episode non-affective psychosis, within-individual sensitivity analysis in those without antipsychotic use during one year before diagnosis.

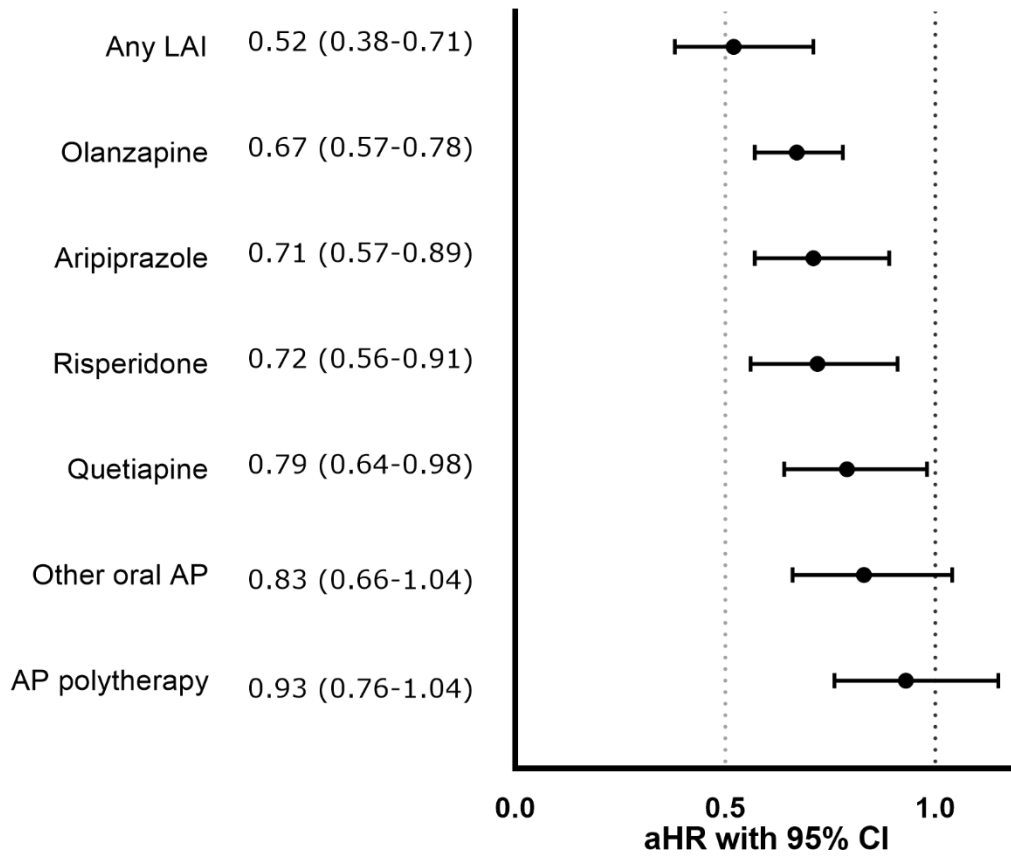

AP, antipsychotic; CI, confidence interval; aHR, adjusted Hazard ratio; LAI, long-acting injectable antipsychotic

**FIGURE S5.** Risk of sickness absence or disability pension antipsychotic during use versus non-use in patients with first-episode non-affective psychosis, within-individual sensitivity analysis in those without sickness absence at baseline.

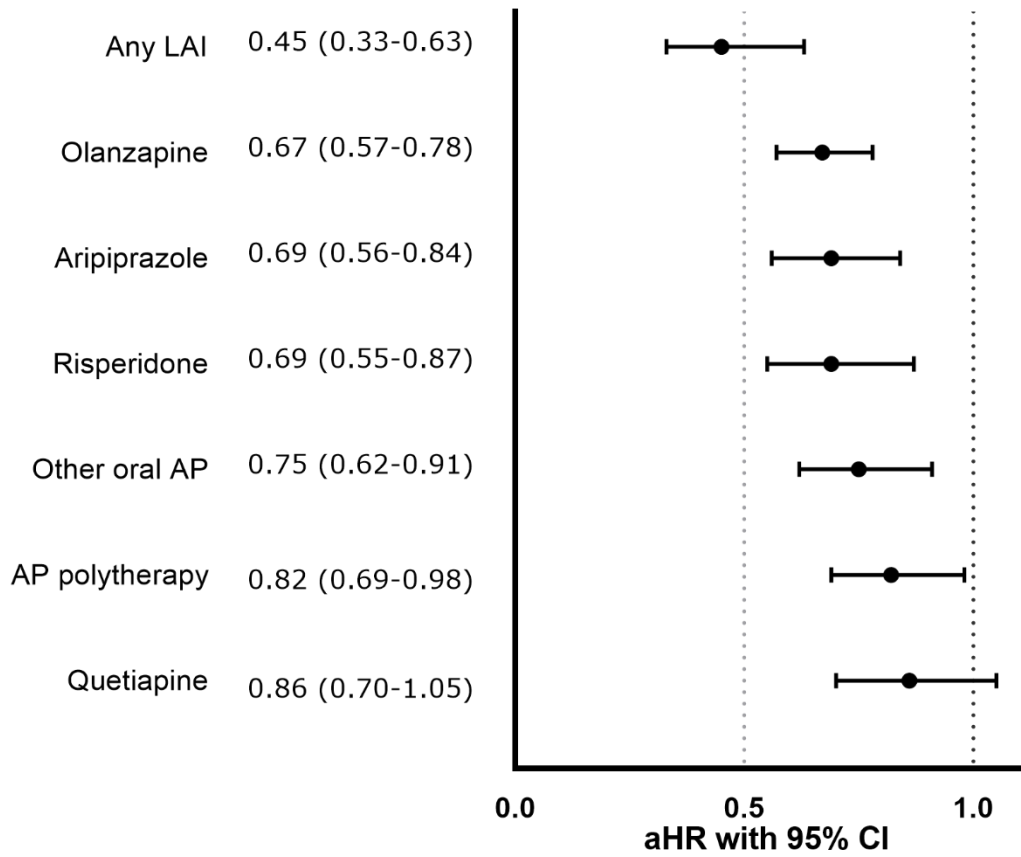

AP, antipsychotic; CI, confidence interval; aHR, adjusted Hazard ratio; LAI, long-acting injectable antipsychotic

**FIGURE S6.** Risk of sickness absence or disability pension antipsychotic during use versus non-use in patients with first-episode non-affective psychosis, within-individual sensitivity analysis when the first 30 days was censored from all exposures.

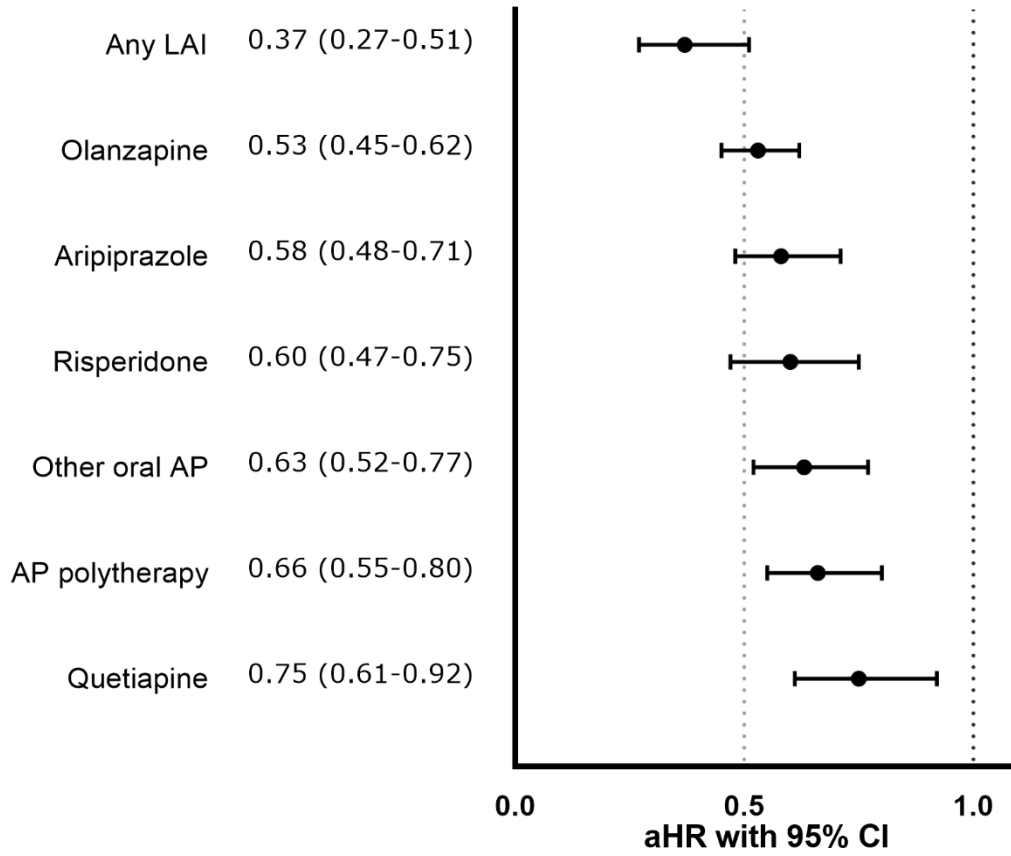

AP, antipsychotic; CI, confidence interval; aHR, adjusted Hazard ratio; LAI, long-acting injectable antipsychotic

**FIGURE S7.** Risk of sickness absence during antipsychotic use versus non-use in patients with first-episode non-affective psychosis, within-individual sensitivity analysis (censoring to disability pension).

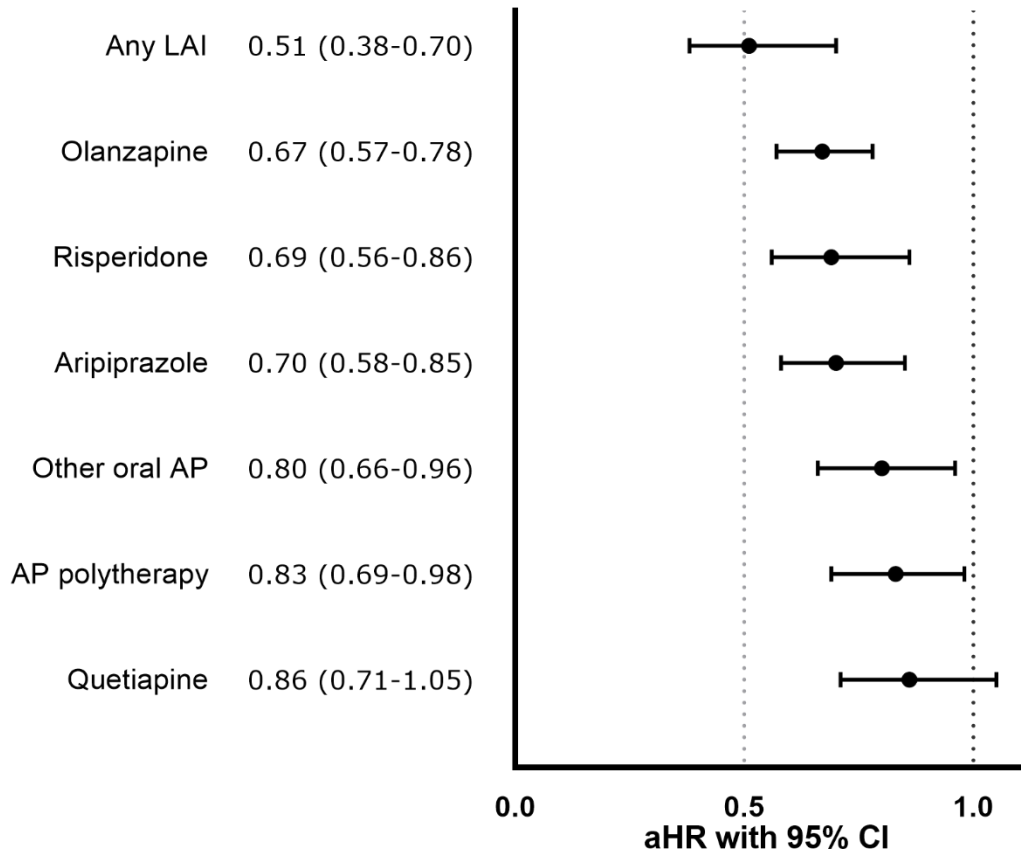

AP, antipsychotic; CI, confidence interval; aHR, adjusted Hazard ratio; LAI, long-acting injectable antipsychotic

**FIGURE S8.** Risk of sickness absence during antipsychotic use versus non-use in patients with first-episode non-affective psychosis, within-individual sensitivity analysis among those who were not granted with disability pension ever during the follow-up.

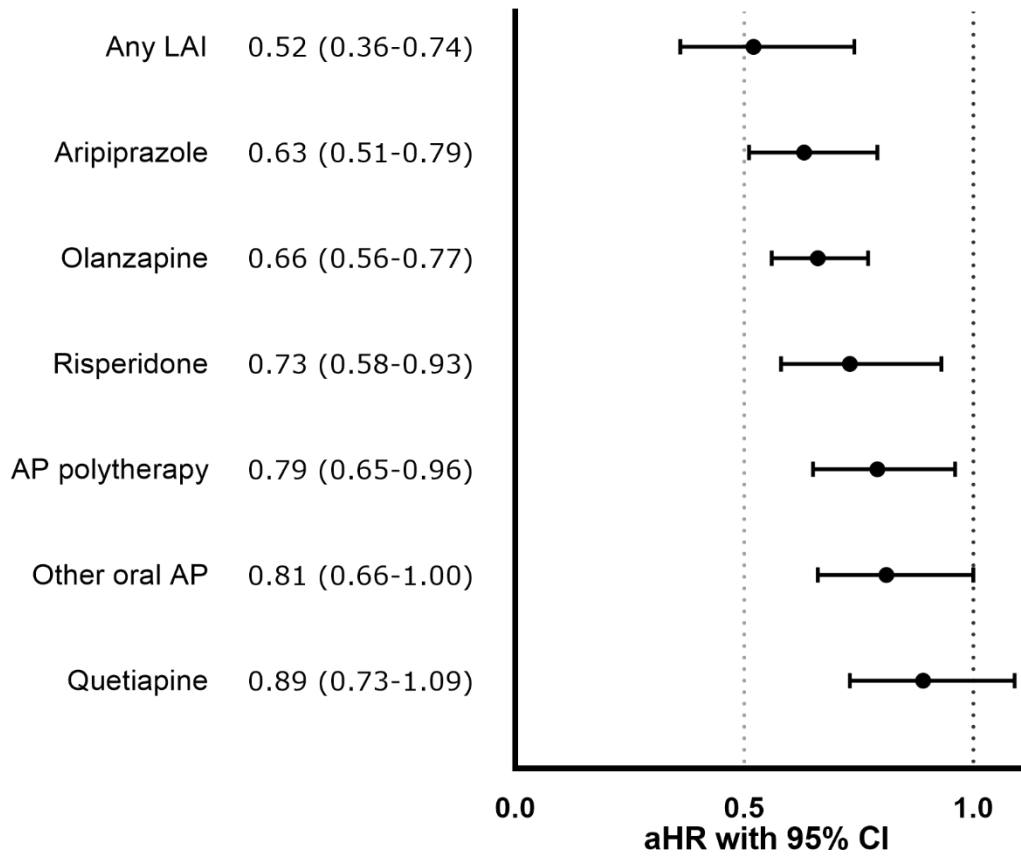

AP, antipsychotic; CI, confidence interval; aHR, adjusted Hazard ratio; LAI, long-acting injectable antipsychotic

**FIGURE S9.** Risk of sickness absence or disability pension during antipsychotic use versus non-use in patients with first-episode non-affective psychosis, within-individual analyses among those who were employed during previous year before cohort entry.

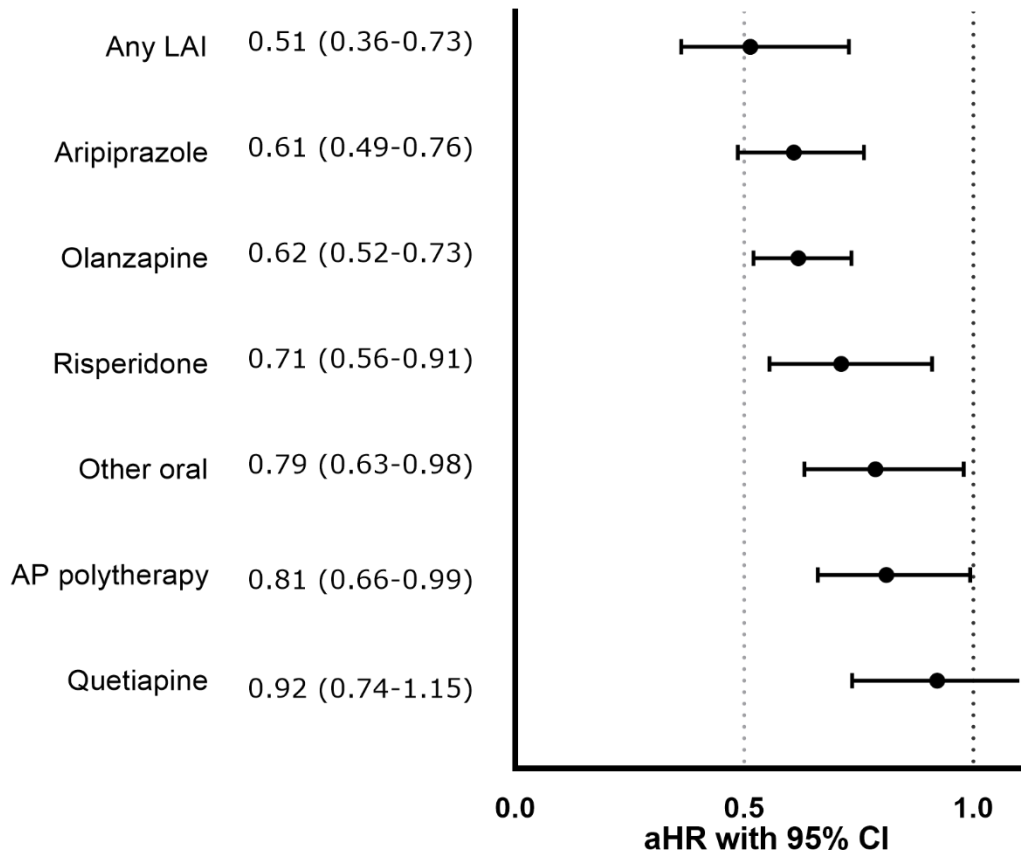

AP, antipsychotic; CI, confidence interval; aHR, adjusted Hazard ratio; LAI, long-acting injectable antipsychotic

**FIGURE S10.** Risk of sickness absence or disability pension during antipsychotic use versus non-use in patients with first-episode non-affective psychosis, within-individual analyses stratified by gender.

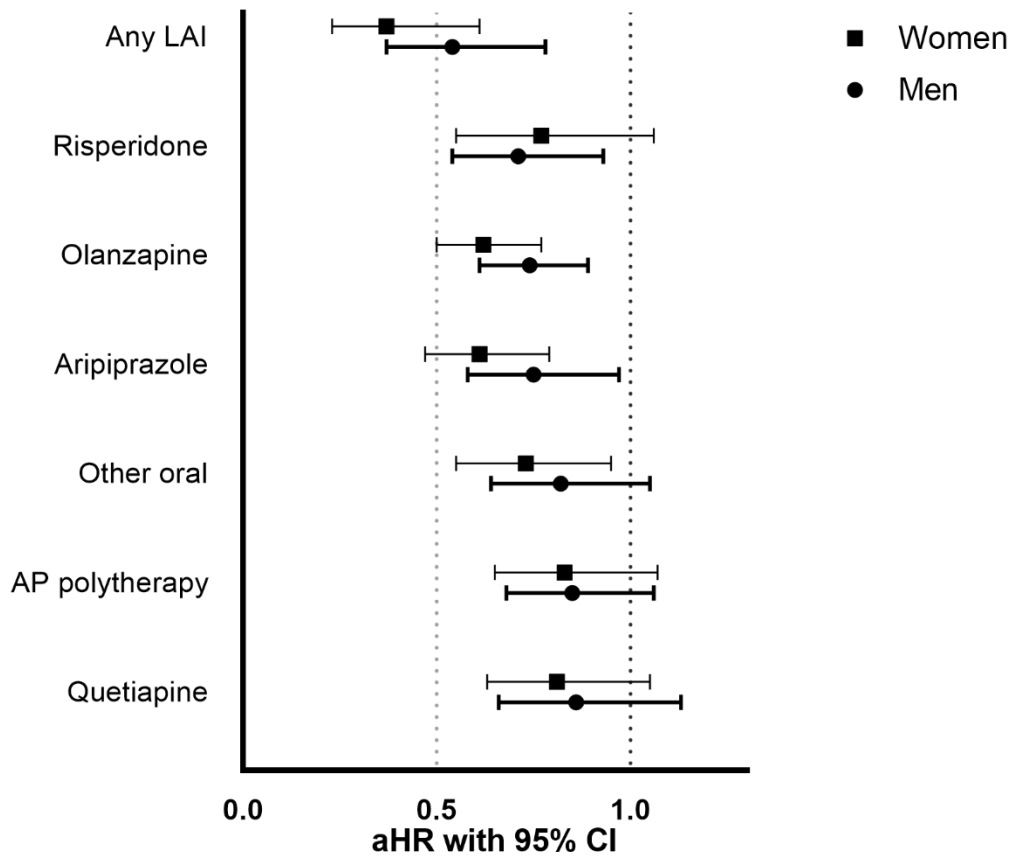

AP, antipsychotic; CI, confidence interval; aHR, adjusted Hazard ratio; LAI, long-acting injectable antipsychotic



**FIGURE S11.** Risk of sickness absence or disability pension during antipsychotic use versus non-use in patients with first-episode non-affective psychosis, within-individual analyses stratified by baseline educational level.

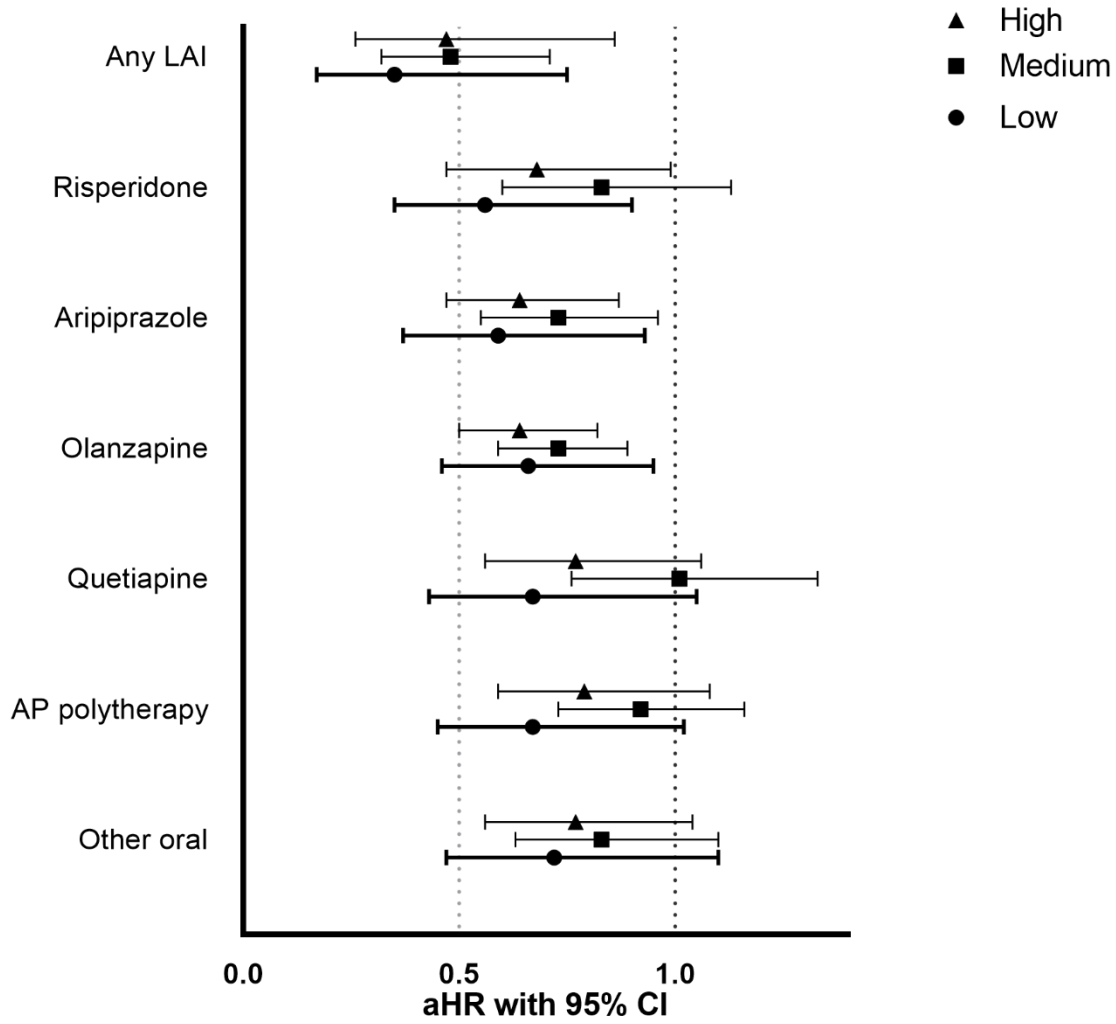

AP, antipsychotic; CI, confidence interval; aHR, adjusted Hazard ratio; LAI, long-acting injectable antipsychotic
